# Supplementary material
Source: PubMed Central journal article supplement (PMC5914410)

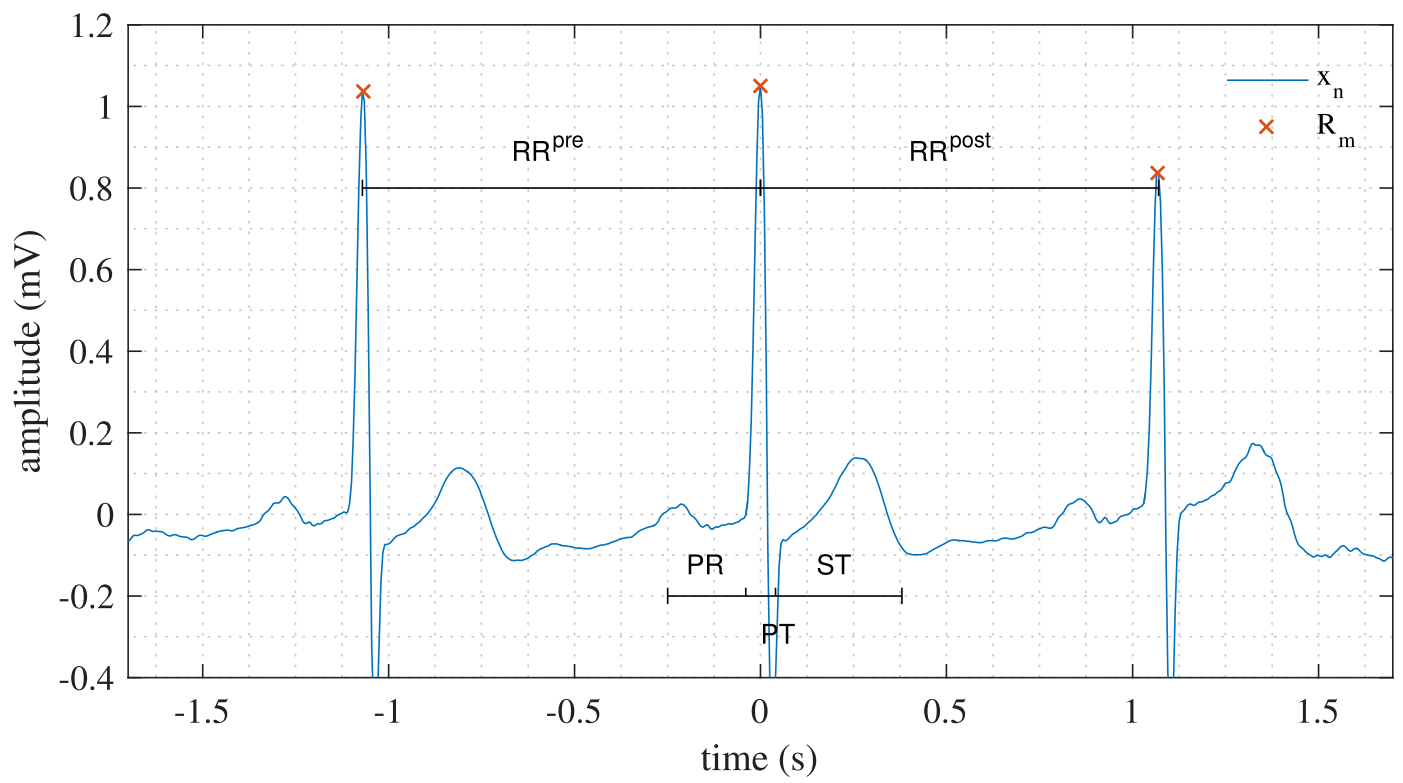

Supplement: zsy006_suppl_supplemental_figure_s1.pdf [file zsy006_suppl_supplemental_figure_s1.pdf]

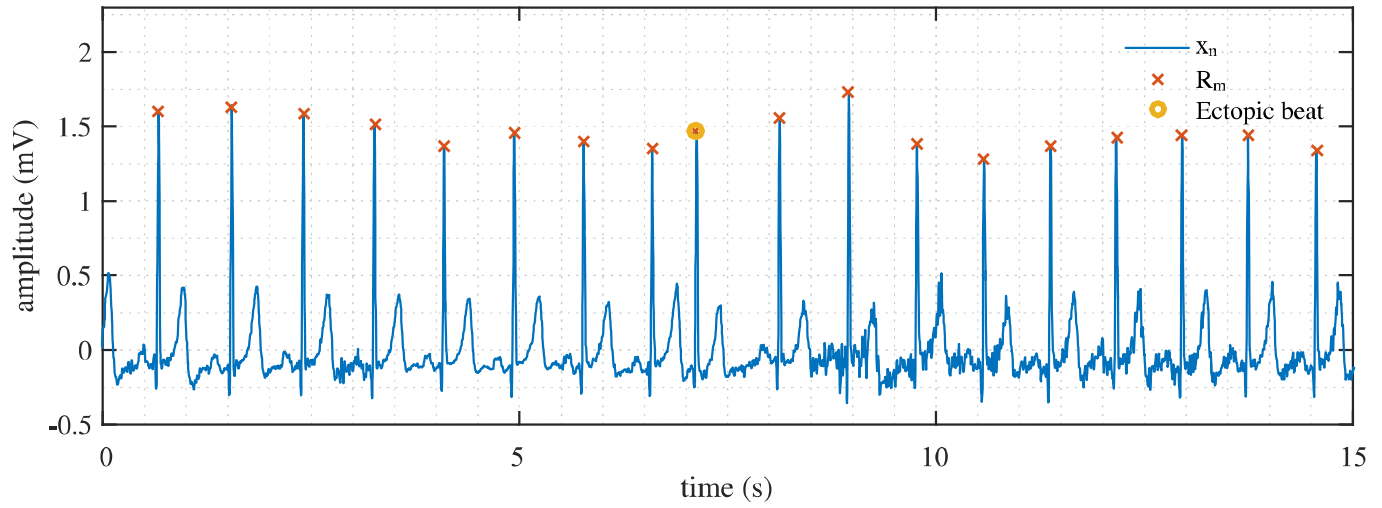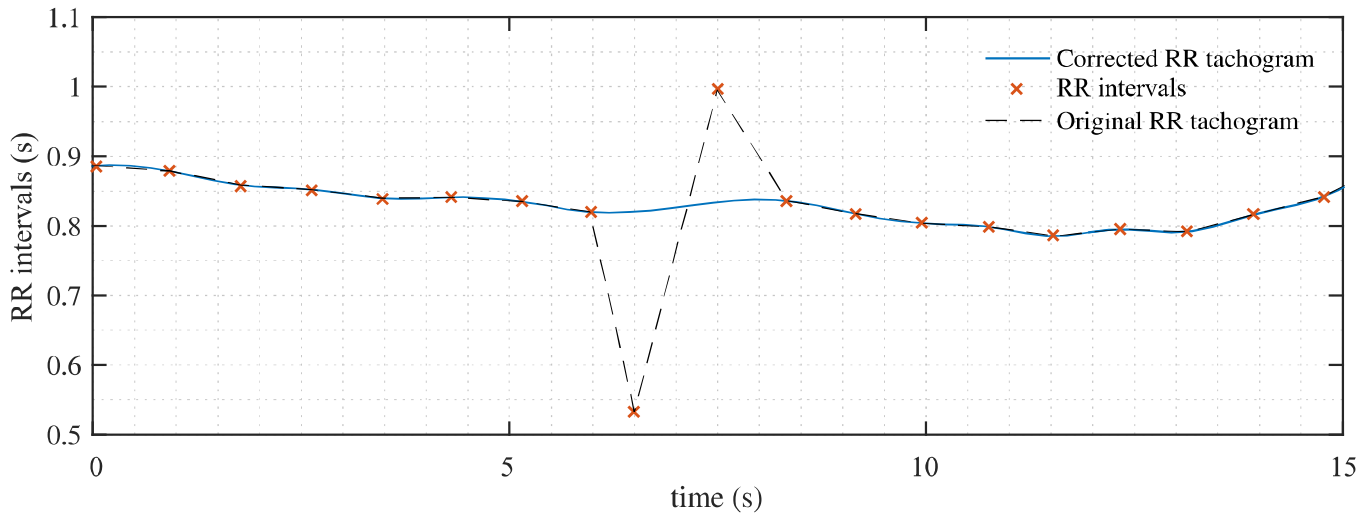

Supplement: zsy006_suppl_supplemental_figure_s2.pdf [file zsy006_suppl_supplemental_figure_s2.pdf]
